# Supplementary material for: Gene Expression Profiling on the Molecular Action of Danshen-Gegen Formula in a Randomized Placebo-Controlled Trial of Postmenopausal Women with Hypercholesterolemia
Source: Hindawi journal article supplement (doi:10.1155/2013/703705), 2013-01-01
Supplement: f1 [file 703705.f1.pdf]

## **Supplementary: Inclusion and exclusion criteria of the clinical study**

### ***Eligibility criteria for participants***

1. 45-65 year of age
2. menopause for more than 12 months
3. fasting serum LDL  $\geq 3.5$  mmol/L
4. not taking hormones, statins or any nutritional supplements
5. No drug use
6. No calcium supplement
7. Have children(s)
8. Non-vegetarian

### ***Exclusion Criteria***

1. have severe medical diseases
2. fasting blood sugar  $> 7.0$  mmol/L
3. sitting blood pressure  $> 140/90$  mmHg
4. creatinine  $> 100 \mu$  mol/L
5. triglyceride  $> 11.3$  mmol/L
6. angina symptoms or with significant ischaemic ECG changes
7. current smoking habit
8. using the lipid lowering drugs within the past 4 weeks
9. taking warfarin currently
10. history of herb hypersensitivity
